# Supplementary material for: Objective Assessment of Acute Pain in Foals Using a Facial Expression-Based Pain Scale
Source: MDPI journal article supplement (doi:10.3390/ani10091610), 2020-09-10
Supplement: s1 [file s1]

| video number | head | eyelids | focus | nostrils | corners mouth/li | muscle tone | head |
|--------------|------|---------|-------|----------|------------------|-------------|------|
| 1            | 0    | 0       | 0     | 0        | 1                | 0           | 0    |
| 2            | 0    | 0       | 1     | 0        | 0                | 1           | 0    |
| 4            | 0    | 0       | 1     | 0        | 0                | 1           | 0    |
| 5            | 0    | 0       | 0     | 0        | 0                | 0           | 0    |
| 6            | 1    | 1       | 1     | 0        | 0                | 0           | 0    |
| 7            | 0    | 0       | 0     | 0        | 1                | 1           | 0    |
| 8            | 0    | 0       | 1     | 0        | 0                | 0           | 0    |
| 10           | 0    | 0       | 1     | 0        | 0                | 0           | 0    |
| 11           | 0    | 0       | 0     | 0        | 1                | 1           | 0    |
| 12           | 0    | 0       | 1     | 0        | 1                | 0           | 0    |
| 13           | 0    | 0       | 0     | 0        | 1                | 0           | 0    |
| 14           | 0    | 0       | 1     | 0        | 1                | 1           | 0    |
| 15           | 0    | 0       | 1     | 0        | 0                | 0           | 0    |
| 16           | 0    | 0       | 1     | 0        | 1                | 1           | 0    |
| 17           | 1    | 1       | 1     | 1        | 0                | 1           | 0    |
| 18           | 0    | 0       | 1     | 0        | 0                | 1           | 0    |
| 19           | 0    | 0       | 1     | 0        | 0                | 0           | 0    |
| 20           | 0    | 0       | 0     | 0        | 0                | 0           | 0    |
| 21           | 0    | 0       | 1     | 0        | 1                | 1           | 0    |
| 22           | 0    | 0       | 1     | 0        | 0                | 0           | 0    |
| 23           | 0    | 0       | 1     | 0        | 0                | 0           | 0    |
| 24           | 0    | 0       | 1     | 0        | 0                | 0           | 0    |
| 25           | 0    | 0       | 1     | 0        | 0                | 1           | 0    |
| 26           | 0    | 0       | 1     | 0        | 1                | 1           | 0    |
| 27           | 0    | 0       | 1     | 0        | 1                | 0           | 0    |
| 28           | 0    | 0       | 1     | 0        | 1                | 1           | 0    |
| 30           | 1    | 1       | 1     | 0        | 1                | 0           | 0    |
| 31           | 0    | 0       | 0     | 0        | 1                | 0           | 0    |
| 32           | 0    | 0       | 0     | 0        | 1                | 1           | 0    |
| 33           | 0    | 0       | 1     | 1        | 1                | 1           | 0    |
| 34           | 0    | 0       | 1     | 0        | 1                | 1           | 0    |
| 35           | 0    | 0       | 1     | 0        | 0                | 0           | 0    |
| 36           | 0    | 0       | 1     | 0        | 1                | 1           | 0    |
| 37           | 0    | 0       | 0     | 0        | 1                | 1           | 0    |
| 38           | 0    | 0       | 1     | 0        | 1                | 0           | 0    |
| 39           | 0    | 0       | 0     | 0        | 1                | 0           | 0    |
| 40           | 0    | 0       | 1     | 0        | 0                | 1           | 0    |
| 41           | 0    | 0       | 1     | 0        | 0                | 1           | 0    |
| 42           | 0    | 0       | 0     | 0        | 1                | 0           | 0    |
| 43           | 0    | 0       | 1     | 0        | 1                | 0           | 0    |
| 44           | 0    | 0       | 0     | 0        | 1                | 0           | 0    |
| 45           | 0    | 0       | 1     | 0        | 1                | 1           | 0    |
| 46           | 0    | 0       | 1     | 0        | 0                | 0           | 0    |
| 47           | 0    | 0       | 0     | 0        | 1                | 0           | 0    |
| 48           | 0    | 0       | 1     | 1        | 0                | 0           | 0    |
| 49           | 0    | 0       | 1     | 0        | 0                | 1           | 0    |
| 50           | 0    | 0       | 0     | 0        | 1                | 0           | 0    |
| 51           | 0    | 0       | 1     | 0        | 1                | 1           | 0    |
| 52           | 0    | 0       | 1     | 0        | 0                | 0           | 0    |

|              |   |   |   |   |   |   |
|--------------|---|---|---|---|---|---|
| 53           | 0 | 1 | 1 | 1 | 0 | 0 |
| 55           | 0 | 0 | 0 | 1 | 0 | 0 |
| video number |   |   |   |   |   |   |
| 1            | 0 | 0 | 0 | 0 | 0 | 1 |
| 2            | 0 | 0 | 0 | 0 | 0 | 2 |
| 4            | 0 | 2 | 0 | 0 | 1 | 5 |
| 5            | 0 | 0 | 0 | 0 | 0 | 0 |
| 6            | 0 | 0 | 0 | 0 | 0 | 2 |
| 7            | 0 | 2 | 0 | 0 | 0 | 4 |
| 8            | 0 | 0 | 0 | 0 | 0 | 1 |
| 10           | 0 | 0 | 0 | 0 | 0 | 1 |
| 11           | 0 | 2 | 0 | 0 | 0 | 4 |
| 12           | 0 | 0 | 0 | 0 | 0 | 2 |
| 13           | 0 | 0 | 0 | 0 | 0 | 1 |
| 14           | 0 | 0 | 0 | 0 | 0 | 3 |
| 15           | 0 | 0 | 0 | 0 | 1 | 2 |
| 16           | 0 | 0 | 0 | 0 | 0 | 3 |
| 17           | 0 | 0 | 0 | 0 | 1 | 5 |
| 18           | 0 | 2 | 0 | 0 | 0 | 4 |
| 19           | 0 | 0 | 0 | 0 | 1 | 2 |
| 20           | 0 | 0 | 0 | 0 | 1 | 1 |
| 21           | 0 | 0 | 0 | 0 | 1 | 4 |
| 22           | 0 | 0 | 0 | 0 | 0 | 1 |
| 23           | 0 | 0 | 0 | 0 | 0 | 1 |
| 24           | 0 | 0 | 0 | 0 | 0 | 1 |
| 25           | 0 | 0 | 0 | 0 | 0 | 2 |
| 26           | 0 | 0 | 0 | 0 | 0 | 3 |
| 27           | 2 | 2 | 0 | 0 | 1 | 7 |
| 28           | 0 | 0 | 0 | 0 | 0 | 3 |
| 30           | 0 | 0 | 0 | 0 | 0 | 3 |
| 31           | 0 | 0 | 0 | 0 | 0 | 1 |
| 32           | 0 | 0 | 0 | 0 | 1 | 3 |
| 33           | 0 | 2 | 0 | 0 | 1 | 7 |
| 34           | 0 | 2 | 0 | 0 | 1 | 6 |
| 35           | 0 | 0 | 0 | 0 | 0 | 1 |
| 36           | 0 | 0 | 0 | 0 | 0 | 3 |
| 37           | 0 | 0 | 0 | 0 | 0 | 2 |
| 38           | 0 | 0 | 0 | 0 | 1 | 3 |
| 39           | 0 | 0 | 0 | 0 | 0 | 1 |
| 40           | 0 | 1 | 0 | 0 | 0 | 3 |
| 41           | 0 | 0 | 0 | 0 | 0 | 2 |
| 42           | 0 | 0 | 0 | 0 | 0 | 1 |
| 43           | 0 | 0 | 0 | 0 | 0 | 2 |
| 44           | 0 | 2 | 0 | 0 | 0 | 3 |
| 45           | 0 | 0 | 0 | 0 | 0 | 3 |
| 46           | 0 | 2 | 0 | 0 | 0 | 3 |
| 47           | 0 | 0 | 0 | 0 | 0 | 1 |
| 48           | 0 | 0 | 0 | 0 | 0 | 2 |
| 49           | 0 | 2 | 0 | 0 | 1 | 5 |

|    |   |   |   |   |   |   |
|----|---|---|---|---|---|---|
| 50 | 0 | 0 | 0 | 0 | 0 | 1 |
| 51 | 0 | 2 | 0 | 0 | 1 | 6 |
| 52 | 0 | 0 | 0 | 0 | 0 | 1 |
| 53 | 0 | 0 | 0 | 0 | 0 | 3 |
| 55 | 0 | 0 | 0 | 0 | 0 | 1 |

**video number EQUUS-FAP**

- 1 control 5
- 2 patient 2 2 hours after NSAIDs Saturday
- 4 control 3
- 5 patient 4 second morning after surgery no NSAID
- 6 patient 7 day 1 after NSAIDs
- 7 control 4
- 8 control 6
- 10 control 22
- 11 patient 5 before NSAID
- 12 control 1
- 13 patient 8 before surgery
- 14 control 7
- 15 patient 2 after NSAIDs Sunday
- 16 patient 4 before surgery
- 17 control 8
- 18 patient 6 2 hours after surgery
- 19 control 2
- 20 control 9
- 21 patient 2 before NSAIDs Saturday
- 22 control 10
- 23 patient 9 after NSAIDs
- 24 control 11
- 25 patient 6 8 hours after surgery
- 26 control 19
- 27 patient 5 2 hours after NSAIDs
- 28 control 14
- 30 Patient 3
- 31 patient 7 day 2 before NSAIDs
- 32 control 15
- 33 patient 6 before surgery
- 34 control 18
- 35 patient 4 2 hours after surgery
- 36 control 21
- 37 patient 1 post NSAID
- 38 patient 9 before NSAIDs
- 39 control 12
- 40 patient 2 before NSAIDs Sunday
- 41 control 13
- 42 patient 7 after surgery before NSAIDs
- 43 patient 4 morning after surgery after NSAID
- 44 control 20
- 45 patient 6 morning after surgery
- 46 patient 8 2 hours after surgery

47 control 16  
48 patient 14 morning after surgery before NSAIDs  
49 patient 1 pre NSAID  
50 patient 10 pre-euthanasia  
51 controle 17
