# Supplementary material for: Objective Assessment of Acute Pain in Foals Using a Facial Expression-Based Pain Scale
Source: MDPI journal article supplement (doi:10.3390/ani10091610), 2020-09-10
Supplement: s1 [file s1]

| video number | head | eyelids | focus | nostrils | corners mouth/li | muscle tone | head |
|--------------|------|---------|-------|----------|------------------|-------------|------|
| 1            | 0    | 0       | 1     | 0        | 1                | 0           | 0    |
| 2            | 0    | 0       | 0     | 0        | 1                | 0           | 0    |
| 3            | 0    | 0       | 0     | 0        | 0                | 0           | 0    |
| 4            | 0    | 0       | 0     | 0        | 1                | 0           | 0    |
| 5            | 0    | 0       | 0     | 0        | 0                | 0           | 0    |
| 6            | 0    | 0       | 0     | 0        | 1                | 0           | 0    |
| 7            | 1    | 0       | 0     | 0        | 0                | 0           | 0    |
| 8            | 0    | 0       | 0     | 0        | 0                | 0           | 0    |
| 9            | 0    | 0       | 0     | 0        | 0                | 1           | 0    |
| 10           | 0    | 0       | 0     | 0        | 1                | 0           | 0    |
| 11           | 0    | 0       | 0     | 0        | 0                | 0           | 0    |
| 12           | 0    | 0       | 0     | 0        | 1                | 1           | 0    |
| 13           | 0    | 0       | 0     | 0        | 1                | 0           | 0    |
| 14           | 0    | 1       | 1     | 1        | 1                | 1           | 0    |
| 15           | 0    | 0       | 0     | 0        | 0                | 0           | 0    |
| 16           | 0    | 1       | 0     | 0        | 0                | 0           | 0    |
| 17           | 0    | 0       | 0     | 0        | 0                | 0           | 0    |
| 18           | 0    | 0       | 0     | 0        | 1                | 0           | 0    |
| 19           | 0    | 0       | 0     | 0        | 0                | 0           | 0    |
| 20           | 1    | 0       | 0     | 0        | 0                | 1           | 2    |
| 21           | 0    | 0       | 0     | 0        | 0                | 0           | 0    |
| 22           | 1    | 1       | 0     | 0        | 1                | 1           | 0    |
| 23           | 0    | 0       | 0     | 0        | 1                | 0           | 0    |
| 24           | 0    | 0       | 0     | 0        | 0                | 0           | 0    |
| 25           | 0    | 0       | 0     | 0        | 0                | 1           | 2    |
| 26           | 0    | 0       | 0     | 0        | 0                | 0           | 1    |
| 27           | 0    | 0       | 0     | 0        | 1                | 0           | 0    |
| 28           | 0    | 0       | 0     | 0        | 0                | 0           | 0    |
| 29           | 0    | 0       | 0     | 0        | 0                | 0           | 0    |
| 30           | 0    | 0       | 0     | 0        | 0                | 0           | 0    |
| 31           | 0    | 1       | 1     | 1        | 0                | 0           | 0    |
| 32           | 1    | 2       | 1     | 1        | 1                | 0           | 0    |
| 33           | 1    | 0       | 0     | 0        | 0                | 0           | 0    |
| 34           | 0    | 0       | 0     | 0        | 1                | 0           | 0    |
| 35           | 1    | 1       | 0     | 0        | 1                | 1           | 0    |
| 36           | 0    | 0       | 0     | 0        | 1                | 0           | 0    |
| 37           | 0    | 0       | 0     | 0        | 1                | 0           | 0    |
| 38           | 0    | 0       | 0     | 0        | 1                | 0           | 0    |
| 39           | 0    | 1       | 0     | 0        | 0                | 0           | 0    |
| 40           | 0    | 0       | 0     | 0        | 0                | 0           | 0    |
| 41           | 0    | 0       | 0     | 0        | 0                | 0           | 0    |
| 42           | 1    | 2       | 1     | 1        | 1                | 0           | 0    |
| 43           | 0    | 0       | 0     | 0        | 0                | 0           | 0    |
| 44           | 0    | 0       | 0     | 0        | 1                | 0           | 0    |
| 45           | 0    | 0       | 0     | 0        | 1                | 0           | 0    |
| 46           | 0    | 0       | 0     | 0        | 0                | 1           | 0    |
| 47           | 0    | 1       | 0     | 0        | 1                | 0           | 0    |
| 48           | 0    | 0       | 0     | 0        | 1                | 1           | 0    |
| 49           | 0    | 0       | 0     | 0        | 1                | 0           | 0    |

|    |   |   |   |   |   |   |
|----|---|---|---|---|---|---|
| 50 | 0 | 0 | 0 | 0 | 0 | 0 |
| 51 | 0 | 0 | 0 | 1 | 0 | 0 |
| 52 | 0 | 0 | 0 | 0 | 0 | 0 |
| 53 | 0 | 1 | 1 | 1 | 1 | 1 |
| 54 | 0 | 1 | 1 | 0 | 0 | 0 |
| 55 | 0 | 0 | 0 | 0 | 0 | 0 |
| 56 | 0 | 0 | 0 | 1 | 1 | 2 |
| 57 | 0 | 0 | 0 | 1 | 0 | 0 |
| 58 | 0 | 0 | 0 | 0 | 0 | 0 |
| 59 | 0 | 0 | 0 | 1 | 0 | 0 |
| 60 | 0 | 0 | 0 | 0 | 0 | 0 |
| 61 | 0 | 0 | 0 | 0 | 0 | 0 |
| 62 | 0 | 1 | 0 | 0 | 0 | 0 |
| 63 | 0 | 0 | 0 | 0 | 1 | 1 |
| 64 | 0 | 0 | 0 | 0 | 0 | 0 |

| video number | yawning | lip smacking | teeth grinding | moaning | ears | total EQUUS-FAP score |   |
|--------------|---------|--------------|----------------|---------|------|-----------------------|---|
| 1            | 0       | 2            | 0              | 0       | 0    | 0                     | 4 |
| 2            | 0       | 0            | 0              | 0       | 2    | 2                     | 3 |
| 3            | 0       | 0            | 0              | 0       | 0    | 0                     | 0 |
| 4            | 0       | 2            | 0              | 0       | 0    | 0                     | 3 |
| 5            | 0       | 2            | 0              | 0       | 0    | 0                     | 2 |
| 6            | 0       | 2            | 2              | 0       | 0    | 0                     | 5 |
| 7            | 0       | 0            | 0              | 0       | 0    | 0                     | 1 |
| 8            | 0       | 0            | 0              | 0       | 0    | 0                     | 0 |
| 9            | 0       | 0            | 0              | 0       | 1    | 1                     | 2 |
| 10           | 2       | 0            | 0              | 0       | 0    | 0                     | 3 |
| 11           | 0       | 0            | 0              | 0       | 0    | 0                     | 0 |
| 12           | 2       | 0            | 0              | 0       | 0    | 0                     | 4 |
| 13           | 0       | 0            | 0              | 0       | 0    | 0                     | 1 |
| 14           | 0       | 2            | 0              | 0       | 1    | 1                     | 7 |
| 15           | 0       | 0            | 0              | 0       | 0    | 0                     | 0 |
| 16           | 0       | 2            | 0              | 0       | 1    | 1                     | 4 |
| 17           | 0       | 0            | 0              | 0       | 0    | 0                     | 0 |
| 18           | 0       | 2            | 0              | 0       | 0    | 0                     | 3 |
| 19           | 0       | 0            | 0              | 0       | 0    | 0                     | 0 |
| 20           | 0       | 2            | 0              | 0       | 1    | 1                     | 7 |
| 21           | 0       | 0            | 0              | 0       | 0    | 0                     | 0 |
| 22           | 0       | 0            | 0              | 0       | 1    | 1                     | 5 |
| 23           | 0       | 0            | 0              | 0       | 0    | 0                     | 1 |
| 24           | 0       | 0            | 0              | 0       | 0    | 0                     | 0 |
| 25           | 0       | 0            | 0              | 0       | 1    | 1                     | 4 |
| 26           | 0       | 2            | 0              | 0       | 1    | 1                     | 4 |
| 27           | 2       | 2            | 0              | 0       | 0    | 0                     | 5 |
| 28           | 0       | 0            | 0              | 0       | 0    | 0                     | 0 |
| 29           | 0       | 0            | 0              | 0       | 0    | 0                     | 0 |
| 30           | 0       | 2            | 0              | 0       | 0    | 0                     | 2 |
| 31           | 2       | 2            | 0              | 0       | 1    | 1                     | 7 |
| 32           | 0       | 0            | 0              | 0       | 1    | 1                     | 6 |

|    |   |   |   |   |   |   |
|----|---|---|---|---|---|---|
| 33 | 0 | 0 | 0 | 0 | 0 | 1 |
| 34 | 0 | 2 | 0 | 0 | 0 | 3 |
| 35 | 0 | 0 | 0 | 0 | 1 | 5 |
| 36 | 2 | 0 | 0 | 0 | 0 | 3 |
| 37 | 0 | 0 | 0 | 0 | 0 | 1 |
| 38 | 0 | 0 | 0 | 0 | 0 | 1 |
| 39 | 0 | 2 | 0 | 0 | 1 | 4 |
| 40 | 0 | 2 | 0 | 0 | 0 | 2 |
| 41 | 0 | 0 | 0 | 0 | 0 | 0 |
| 42 | 0 | 0 | 0 | 0 | 1 | 6 |
| 43 | 0 | 0 | 0 | 0 | 0 | 0 |
| 44 | 2 | 2 | 0 | 0 | 1 | 6 |
| 45 | 0 | 2 | 2 | 0 | 0 | 5 |
| 46 | 2 | 2 | 0 | 0 | 0 | 5 |
| 47 | 0 | 2 | 0 | 0 | 0 | 4 |
| 48 | 0 | 0 | 0 | 0 | 1 | 3 |
| 49 | 0 | 0 | 0 | 0 | 0 | 1 |
| 50 | 0 | 0 | 0 | 0 | 0 | 0 |
| 51 | 0 | 0 | 0 | 0 | 2 | 3 |
| 52 | 0 | 0 | 0 | 0 | 0 | 0 |
| 53 | 0 | 2 | 0 | 0 | 1 | 8 |
| 54 | 2 | 2 | 0 | 0 | 1 | 7 |
| 55 | 0 | 0 | 0 | 0 | 0 | 0 |
| 56 | 0 | 2 | 0 | 0 | 1 | 7 |
| 57 | 0 | 0 | 0 | 0 | 0 | 1 |
| 58 | 0 | 0 | 0 | 0 | 0 | 0 |
| 59 | 0 | 2 | 0 | 0 | 0 | 3 |
| 60 | 0 | 0 | 0 | 0 | 0 | 0 |
| 61 | 0 | 2 | 0 | 0 | 0 | 2 |
| 62 | 0 | 2 | 0 | 0 | 1 | 4 |
| 63 | 0 | 0 | 0 | 0 | 1 | 3 |
| 64 | 0 | 2 | 0 | 0 | 1 | 3 |

#### video number patients

- 2 patient 1 (before NSAID's)
- 5 patient 2 (before surgery)
- 7 patient 3 (after surgery, post NSAIDs)
- 9 patient 4 (after surgery, post NSAIDs)
- 11 patient 5 (after surgery, pre NSAIDs)
- 12 patient 3 (after OK, pre NSAIDs)
- 14 patient 6 (after surgery, pre NSAIDs)
- 16 patient 7 8 hours post NSAIDs
- 18 patient 1 (2,5 h after NSAIDs)
- 20 patient 8
- 22 patient 4 (after surgery, before NSAIDs)
- 25 patient 9 (9 h after NSAIDs)
- 27 patient 4 (before surgery)
- 30 patient 4 (before surgery)
- 32 patient 6 (after surgery, 1 hour after NSAIDs)

33 patient 3 (after surgery, post NSAIDs)  
35 patient 4 (after surgery, before NSAIDs)  
37 patient 5 (after surgery, pre NSAIDs)  
39 patient 7 8 hours post NSAIDs  
42 patient 6 (after surgery, 1 hour after NSAIDs)  
44 patient 6 (after surgery, 1 hour after NSAIDs)  
46 patient 3 (after OK, pre NSAIDs)  
48 patient 4 (after surgery, post NSAIDs)  
51 patient 1 (before NSAIDs)  
53 patient 6 (after surgery, pre NSAIDs)  
56 patient 8  
59 patient 1 (2,5 h after NSAIDs)  
61 patient 2 (before surgery)  
63 patient 9 (9 h after NSAIDs)  
64 patient 4 (before surgery)

#### **video number controls**

1 foal 6  
3 Foal 8  
4 Foal 13  
6 Foal 4  
8 foal 16  
10 foal 9  
13 Foal 15  
15 Foal 10  
17 Foal 2  
19 Foal 3  
21 Foal 12  
23 foal 17  
24 foal 5  
26 Foal 7  
28 Foal 14  
29 Foal 1  
31 Foal 11  
47 foal 6  
40 Foal 8  
34 Foal 13  
45 Foal 4  
52 foal 16  
36 foal 9  
57 Foal 15  
43 Foal 10  
49 Foal 2  
41 Foal 3  
50 Foal 12  
38 foal 17  
55 foal 5  
62 Foal 7  
58 Foal 14

60 Foal 1  
54 Foal 11
