# Supplementary material for: Objective Assessment of Acute Pain in Foals Using a Facial Expression-Based Pain Scale
Source: MDPI journal article supplement (doi:10.3390/ani10091610), 2020-09-10
Supplement: s1 [file s1]

| video number | head | eyelids | focus | nostrils | corners mouth/li | muscle tone | head |
|--------------|------|---------|-------|----------|------------------|-------------|------|
| 1            | 0    | 0       | 1     | 0        | 0                | 0           | 0    |
| 2            | 0    | 0       | 0     | 0        | 1                | 1           | 0    |
| 3            | 0    | 0       | 0     | 0        | 0                | 0           | 0    |
| 4            | 0    | 0       | 0     | 0        | 1                | 0           | 0    |
| 5            | 0    | 0       | 1     | 0        | 0                | 0           | 0    |
| 6            | 0    | 0       | 0     | 0        | 1                | 0           | 0    |
| 7            | 1    | 0       | 0     | 0        | 0                | 1           | 0    |
| 8            | 0    | 0       | 0     | 0        | 0                | 0           | 0    |
| 9            | 1    | 0       | 0     | 0        | 1                | 1           | 0    |
| 10           | 0    | 0       | 0     | 0        | 1                | 0           | 0    |
| 11           | 0    | 0       | 1     | 0        | 1                | 0           | 0    |
| 12           | 0    | 0       | 1     | 0        | 1                | 1           | 0    |
| 13           | 0    | 0       | 0     | 0        | 1                | 0           | 0    |
| 14           | 1    | 0       | 2     | 0        | 1                | 1           | 0    |
| 15           | 0    | 0       | 0     | 0        | 0                | 0           | 0    |
| 16           | 0    | 0       | 1     | 1        | 0                | 0           | 0    |
| 17           | 0    | 0       | 0     | 0        | 1                | 0           | 0    |
| 18           | 0    | 0       | 0     | 0        | 1                | 0           | 0    |
| 19           | 0    | 0       | 0     | 0        | 0                | 0           | 0    |
| 20           | 1    | 0       | 1     | 1        | 0                | 1           | 0    |
| 21           | 0    | 0       | 0     | 0        | 0                | 0           | 0    |
| 22           | 1    | 0       | 1     | 1        | 0                | 1           | 0    |
| 23           | 0    | 0       | 1     | 0        | 1                | 0           | 0    |
| 24           | 0    | 0       | 0     | 0        | 0                | 0           | 0    |
| 25           | 1    | 0       | 1     | 0        | 1                | 1           | 0    |
| 26           | 0    | 0       | 1     | 0        | 0                | 0           | 0    |
| 27           | 1    | 0       | 1     | 0        | 1                | 1           | 0    |
| 28           | 0    | 0       | 0     | 0        | 0                | 1           | 0    |
| 29           | 0    | 0       | 0     | 0        | 0                | 0           | 0    |
| 30           | 0    | 0       | 0     | 0        | 1                | 0           | 0    |
| 31           | 0    | 0       | 1     | 0        | 1                | 0           | 0    |
| 32           | 1    | 0       | 1     | 1        | 0                | 0           | 0    |

| video number | yawning | lip smacking | teeth grinding | moaning | ears | total EQUUS-FAP score |   |
|--------------|---------|--------------|----------------|---------|------|-----------------------|---|
| 1            | 0       | 0            | 2              | 0       | 0    | 0                     | 3 |
| 2            | 0       | 0            | 0              | 0       | 0    | 2                     | 4 |
| 3            | 0       | 0            | 0              | 0       | 0    | 1                     | 1 |
| 4            | 0       | 0            | 2              | 0       | 0    | 0                     | 3 |
| 5            | 0       | 0            | 2              | 0       | 0    | 0                     | 3 |
| 6            | 0       | 0            | 2              | 0       | 0    | 0                     | 3 |
| 7            | 0       | 0            | 0              | 0       | 0    | 0                     | 2 |
| 8            | 0       | 0            | 0              | 0       | 0    | 0                     | 0 |
| 9            | 0       | 0            | 0              | 0       | 0    | 1                     | 4 |
| 10           | 2       | 0            | 0              | 0       | 0    | 1                     | 4 |
| 11           | 0       | 0            | 0              | 0       | 0    | 0                     | 2 |
| 12           | 2       | 0            | 2              | 0       | 0    | 0                     | 7 |
| 13           | 0       | 0            | 0              | 0       | 0    | 0                     | 1 |
| 14           | 0       | 0            | 2              | 0       | 0    | 2                     | 9 |

|    |   |   |   |   |   |   |
|----|---|---|---|---|---|---|
| 15 | 0 | 0 | 0 | 0 | 0 | 0 |
| 16 | 0 | 2 | 0 | 0 | 1 | 5 |
| 17 | 0 | 0 | 0 | 0 | 0 | 1 |
| 18 | 0 | 2 | 0 | 0 | 1 | 4 |
| 19 | 0 | 0 | 0 | 0 | 1 | 1 |
| 20 | 0 | 2 | 0 | 0 | 1 | 7 |
| 21 | 0 | 0 | 0 | 0 | 0 | 0 |
| 22 | 0 | 0 | 0 | 0 | 1 | 5 |
| 23 | 0 | 0 | 0 | 0 | 0 | 2 |
| 24 | 0 | 0 | 0 | 0 | 0 | 0 |
| 25 | 0 | 0 | 0 | 0 | 1 | 5 |
| 26 | 0 | 2 | 0 | 0 | 1 | 4 |
| 27 | 2 | 2 | 0 | 0 | 0 | 8 |
| 28 | 0 | 0 | 0 | 0 | 0 | 1 |
| 29 | 0 | 0 | 0 | 0 | 0 | 0 |
| 30 | 0 | 2 | 0 | 0 | 0 | 3 |
| 31 | 2 | 2 | 0 | 0 | 1 | 7 |
| 32 | 0 | 0 | 0 | 0 | 2 | 5 |

#### video number patients

- 2 patient 1 (before NSAID's)
- 5 patient 2 (before surgery)
- 7 patient 3 (after surgery, post NSAIDs)
- 9 patient 4 (after surgery, post NSAIDs)
- 11 patient 5 (after surgery, pre NSAIDs)
- 12 patient 3 (after OK, pre NSAIDs)
- 14 patient 6 (after surgery, pre NSAIDs)
- 16 patient 7 8 hours post NSAIDs
- 18 patient 1 (2,5 h after NSAIDs)
- 20 patient 8
- 22 patient 4 (after surgery, before NSAIDs)
- 25 patient 9 (9 h after NSAIDs)
- 27 patient 4 (before surgery)
- 30 patient 4 (before surgery)
- 32 patient 6 (after surgery, 1 hour after NSAIDs)
  
- 33 patient 3 (after surgery, post NSAIDs)
- 35 patient 4 (after surgery, before NSAIDs)
- 37 patient 5 (after surgery, pre NSAIDs)
- 39 patient 7 8 hours post NSAIDs
- 42 patient 6 (after surgery, 1 hour after NSAIDs)
- 44 patient 6 (after surgery, 1 hour after NSAIDs)
- 46 patient 3 (after OK, pre NSAIDs)
- 48 patient 4 (after surgery, post NSAIDs)
- 51 patient 1 (before NSAIDs)
- 53 patient 6 (after surgery, pre NSAIDs)
- 56 patient 8
- 59 patient 1 (2,5 h after NSAIDs)
- 61 patient 2 (before surgery)

63 patient 9 (9 h after NSAIDs)

64 patient 4 (before surgery)

**video number controls**

1 foal 6  
3 Foal 8  
4 Foal 13  
6 Foal 4  
8 foal 16  
10 foal 9  
13 Foal 15  
15 Foal 10  
17 Foal 2  
19 Foal 3  
21 Foal 12  
23 foal 17  
24 foal 5  
26 Foal 7  
28 Foal 14  
29 Foal 1  
31 Foal 11  
47 foal 6  
40 Foal 8  
34 Foal 13  
45 Foal 4  
52 foal 16  
36 foal 9  
57 Foal 15  
43 Foal 10  
49 Foal 2  
41 Foal 3  
50 Foal 12  
38 foal 17  
55 foal 5  
62 Foal 7  
58 Foal 14  
60 Foal 1  
54 Foal 11
