# Supplementary material for: Objective Assessment of Acute Pain in Foals Using a Facial Expression-Based Pain Scale
Source: MDPI journal article supplement (doi:10.3390/ani10091610), 2020-09-10
Supplement: s1 [file s1]

**neonatal patients**

|           | condition                     | gender | age (days) | breed        |
|-----------|-------------------------------|--------|------------|--------------|
| patient1  | orthopaedic surgery           | filly  | 14         | Friesian     |
| patient2  | orthopaedic surgery           | colt   | 14         | Thoroughbred |
| patient3  | bladder rupture               | colt   | 3          | Thoroughbred |
| patient4  | inguinal surgery post surgery | colt   | 10         | Warmblood    |
| patient5  | orthopaedic surgery           | colt   | 14         | Thoroughbred |
| patient6  | inguinal surgery post surgery | filly  | 12         | Warmblood    |
| patient7  | orthopaedic surgery           | filly  | 14         | Thoroughbred |
| patient8  | gastric ulcera                | colt   | 14         | Warmblood    |
| patient9  | laminitis                     | filly  | 6          | Warmblood    |
| patient10 | septic knee joint             | colt   | 5          | pony         |
|           |                               | mean   | 10,60      |              |
|           |                               | stdv   | 4,35       |              |

**neonatal healthy control foals**

|             |       |      |              |
|-------------|-------|------|--------------|
| controle 1  | colt  | 3    | Warmblood    |
| controle 2  | filly | 5    | Coldblood    |
| controle 3  | filly | 7    | Warmblood    |
| controle 4  | filly | 3    | Coldblood    |
| controle 5  | filly | 4    | Warmblood    |
| controle6   | filly | 3    | Warmblood    |
| controle 7  | colt  | 5    | Warmblood    |
| controle 8  | colt  | 5    | Warmblood    |
| controle 9  | colt  | 7    | Warmblood    |
| controle 10 | filly | 4    | Warmblood    |
| controle 11 | colt  | 6    | haflinger    |
| controle 12 | colt  | 5    | Coldblood    |
| controle 13 | filly | 7    | Warmblood    |
| controle 14 | filly | 14   | Thoroughbred |
| controle 15 | colt  | 5    | Coldblood    |
| controle 16 | filly | 4    | Warmblood    |
| controle 17 | filly | 5    | Warmblood    |
|             | mean  | 5,41 |              |
|             | stdv  | 2,58 |              |

**older patients**

|           | condition                        | gender | age (days) | breed        |
|-----------|----------------------------------|--------|------------|--------------|
| patient1  | post colic SI volvulus           | filly  | 28         | Thoroughbred |
| patient2  | trauma                           | filly  | 112        | Warmblood    |
| patient3  | dental disorder post-surgery     | filly  | 112        | Warmblood    |
| patient4  | umbilical hernia post surgery    | filly  | 140        | Warmblood    |
| patient5  | phalanx 3 fracture               | filly  | 98         | Warmblood    |
| patient6  | trauma                           | colt   | 140        | Warmblood    |
| patient7  | trauma                           | filly  | 140        | Warmblood    |
| patient8  | trauma                           | filly  | 126        | Warmblood    |
| patient9  | desmotomy check ligament post    | filly  | 84         | Warmblood    |
| patient10 | abdominal rupture pre euthanasia | filly  | 49         | Thoroughbred |
|           |                                  | mean   | 102,9      |              |
|           |                                  | stdv   | 39,05      |              |

**older healthy control foals**

|             | gender | age (days) | breed        |
|-------------|--------|------------|--------------|
| controle 1  | colt   | 42         | Thoroughbred |
| controle 2  | colt   | 73         | Warmblood    |
| controle 3  | colt   | 73         | Warmblood    |
| controle 4  | colt   | 130        | Warmblood    |
| controle 5  | colt   | 100        | Warmblood    |
| controle6   | colt   | 157        | Warmblood    |
| controle 7  | colt   | 95         | Warmblood    |
| controle 8  | colt   | 91         | Warmblood    |
| controle 9  | colt   | 175        | Warmblood    |
| controle 10 | filly  | 114        | Warmblood    |
| controle 11 | filly  | 137        | Warmblood    |
| controle 12 | filly  | 73         | Warmblood    |
| controle 13 | filly  | 67         | Warmblood    |
| controle 14 | filly  | 65         | Warmblood    |
| controle 15 | filly  | 170        | Warmblood    |
| controle 16 | filly  | 122        | Warmblood    |
| controle 17 | filly  | 91         | Warmblood    |
| controle 18 | filly  | 120        | Warmblood    |
| controle 19 | filly  | 176        | Warmblood    |
| controle 20 | filly  | 115        | Warmblood    |
| controle 21 | filly  | 172        | Warmblood    |
| controle 22 | filly  | 111        | Warmblood    |
|             | mean   | 112,23     |              |
|             | stdv   | 39,76      |              |
