# Supplementary material for: Objective Assessment of Acute Pain in Foals Using a Facial Expression-Based Pain Scale
Source: MDPI journal article supplement (doi:10.3390/ani10091610), 2020-09-10
Supplement: s1 [file s1]

| video number | head | eyelids | focus | nostrils | corners mouth/li | muscle tone | head |
|--------------|------|---------|-------|----------|------------------|-------------|------|
| 1            | 0    | 0       | 0     | 0        | 1                | 0           | 0    |
| 2            | 0    | 0       | 0     | 0        | 1                | 0           | 0    |
| 4            | 0    | 0       | 0     | 0        | 0                | 0           | 0    |
| 5            | 0    | 0       | 0     | 0        | 0                | 0           | 0    |
| 6            | 0    | 0       | 0     | 0        | 0                | 0           | 0    |
| 7            | 0    | 0       | 0     | 0        | 0                | 1           | 0    |
| 8            | 0    | 0       | 0     | 0        | 0                | 0           | 0    |
| 10           | 0    | 0       | 0     | 0        | 0                | 0           | 0    |
| 11           | 0    | 0       | 0     | 0        | 0                | 0           | 0    |
| 12           | 0    | 0       | 0     | 0        | 1                | 0           | 0    |
| 13           | 0    | 0       | 0     | 0        | 0                | 0           | 0    |
| 14           | 0    | 0       | 0     | 0        | 1                | 0           | 0    |
| 15           | 0    | 0       | 0     | 0        | 0                | 0           | 0    |
| 16           | 0    | 0       | 0     | 0        | 1                | 0           | 1    |
| 17           | 0    | 1       | 0     | 0        | 0                | 0           | 0    |
| 18           | 0    | 0       | 0     | 0        | 0                | 0           | 0    |
| 19           | 0    | 0       | 0     | 0        | 0                | 0           | 0    |
| 20           | 0    | 0       | 0     | 0        | 0                | 0           | 0    |
| 21           | 0    | 0       | 0     | 0        | 1                | 0           | 0    |
| 22           | 0    | 0       | 0     | 0        | 0                | 0           | 0    |
| 23           | 0    | 0       | 0     | 0        | 1                | 0           | 0    |
| 24           | 0    | 0       | 0     | 0        | 0                | 0           | 0    |
| 25           | 0    | 1       | 0     | 0        | 0                | 0           | 0    |
| 26           | 0    | 0       | 0     | 0        | 1                | 0           | 0    |
| 27           | 0    | 0       | 0     | 0        | 0                | 0           | 0    |
| 28           | 0    | 0       | 0     | 0        | 0                | 0           | 0    |
| 30           | 1    | 1       | 0     | 0        | 0                | 0           | 1    |
| 31           | 0    | 0       | 0     | 0        | 0                | 1           | 0    |
| 32           | 0    | 0       | 0     | 0        | 0                | 0           | 0    |
| 33           | 0    | 0       | 0     | 0        | 0                | 0           | 0    |
| 34           | 0    | 0       | 0     | 0        | 0                | 0           | 0    |
| 35           | 0    | 0       | 0     | 0        | 0                | 0           | 0    |
| 36           | 0    | 0       | 0     | 0        | 0                | 0           | 0    |
| 37           | 0    | 0       | 0     | 0        | 0                | 1           | 0    |
| 38           | 0    | 0       | 0     | 0        | 0                | 0           | 1    |
| 39           | 0    | 0       | 0     | 0        | 0                | 0           | 0    |
| 40           | 0    | 0       | 0     | 0        | 1                | 0           | 0    |
| 41           | 0    | 0       | 0     | 0        | 0                | 0           | 0    |
| 42           | 0    | 0       | 0     | 0        | 1                | 0           | 0    |
| 43           | 0    | 0       | 0     | 0        | 0                | 0           | 0    |
| 44           | 0    | 0       | 0     | 0        | 0                | 0           | 0    |
| 45           | 0    | 0       | 1     | 0        | 0                | 0           | 0    |
| 46           | 0    | 1       | 0     | 0        | 1                | 0           | 1    |
| 47           | 0    | 0       | 0     | 0        | 0                | 0           | 0    |
| 48           | 0    | 0       | 0     | 0        | 0                | 0           | 0    |
| 49           | 0    | 1       | 0     | 0        | 1                | 0           | 1    |
| 50           | 2    | 0       | 1     | 1        | 1                | 0           | 0    |
| 51           | 0    | 0       | 0     | 0        | 0                | 0           | 0    |
| 52           | 0    | 0       | 0     | 0        | 1                | 0           | 0    |

|     |   |   |   |   |   |   |
|-----|---|---|---|---|---|---|
| 53  | 0 | 0 | 0 | 1 | 0 | 0 |
| 55  | 0 | 0 | 0 | 0 | 0 | 0 |
| 56  | 0 | 0 | 0 | 0 | 0 | 0 |
| 57  | 0 | 0 | 0 | 0 | 0 | 0 |
| 58  | 0 | 0 | 0 | 0 | 1 | 0 |
| 59  | 0 | 0 | 0 | 0 | 0 | 0 |
| 61  | 0 | 0 | 0 | 1 | 0 | 0 |
| 62  | 0 | 0 | 0 | 0 | 0 | 0 |
| 63  | 0 | 0 | 0 | 1 | 0 | 0 |
| 64  | 0 | 0 | 0 | 0 | 0 | 0 |
| 65  | 0 | 0 | 0 | 0 | 0 | 0 |
| 66  | 1 | 0 | 0 | 1 | 0 | 0 |
| 67  | 0 | 0 | 0 | 1 | 0 | 0 |
| 68  | 0 | 1 | 0 | 0 | 0 | 0 |
| 69  | 0 | 0 | 0 | 0 | 0 | 0 |
| 70  | 1 | 0 | 0 | 0 | 0 | 0 |
| 71  | 0 | 0 | 0 | 0 | 0 | 0 |
| 72  | 0 | 0 | 0 | 1 | 0 | 0 |
| 73  | 0 | 0 | 0 | 0 | 0 | 0 |
| 74  | 0 | 0 | 0 | 1 | 0 | 1 |
| 75  | 0 | 0 | 0 | 1 | 0 | 0 |
| 76  | 0 | 1 | 0 | 0 | 0 | 0 |
| 77  | 0 | 0 | 0 | 1 | 0 | 0 |
| 78  | 0 | 0 | 0 | 0 | 0 | 0 |
| 79  | 0 | 0 | 0 | 0 | 0 | 0 |
| 81  | 0 | 1 | 1 | 0 | 0 | 1 |
| 82  | 0 | 0 | 0 | 0 | 1 | 0 |
| 83  | 0 | 0 | 0 | 0 | 0 | 0 |
| 84  | 0 | 0 | 0 | 0 | 0 | 0 |
| 85  | 0 | 0 | 0 | 0 | 0 | 0 |
| 86  | 0 | 0 | 0 | 1 | 0 | 0 |
| 87  | 0 | 0 | 0 | 0 | 0 | 0 |
| 88  | 0 | 0 | 0 | 0 | 0 | 0 |
| 89  | 0 | 0 | 0 | 1 | 0 | 1 |
| 90  | 0 | 0 | 0 | 1 | 0 | 0 |
| 91  | 0 | 0 | 0 | 1 | 0 | 0 |
| 92  | 0 | 0 | 0 | 0 | 0 | 0 |
| 93  | 0 | 0 | 0 | 0 | 1 | 0 |
| 94  | 0 | 0 | 0 | 0 | 0 | 0 |
| 95  | 0 | 0 | 0 | 0 | 0 | 0 |
| 96  | 0 | 1 | 1 | 0 | 0 | 0 |
| 97  | 0 | 1 | 0 | 1 | 0 | 0 |
| 98  | 0 | 0 | 0 | 0 | 0 | 0 |
| 99  | 0 | 0 | 0 | 0 | 0 | 0 |
| 100 | 1 | 1 | 0 | 1 | 0 | 1 |
| 101 | 2 | 0 | 1 | 1 | 0 | 0 |
| 102 | 0 | 0 | 0 | 0 | 0 | 0 |
| 3   | 0 | 1 | 0 | 0 | 0 | 0 |
| 9   | 0 | 0 | 0 | 0 | 0 | 0 |

|    |   |   |   |   |   |   |
|----|---|---|---|---|---|---|
| 29 | 0 | 0 | 0 | 0 | 0 | 0 |
| 54 | 0 | 1 | 0 | 0 | 0 | 0 |
| 60 | 0 | 0 | 0 | 0 | 0 | 0 |
| 80 | 0 | 0 | 0 | 0 | 0 | 0 |

| video number | yawning | lip smacking | teeth grinding | moaning | ears | total EQUUS-FAP score |   |
|--------------|---------|--------------|----------------|---------|------|-----------------------|---|
| 1            | 0       | 0            | 0              | 0       | 0    | 0                     | 1 |
| 2            | 0       | 0            | 0              | 0       | 0    | 0                     | 1 |
| 4            | 0       | 0            | 0              | 0       | 0    | 0                     | 0 |
| 5            | 0       | 2            | 0              | 0       | 0    | 0                     | 2 |
| 6            | 0       | 2            | 0              | 0       | 1    | 1                     | 3 |
| 7            | 0       | 0            | 0              | 0       | 0    | 0                     | 1 |
| 8            | 0       | 2            | 0              | 0       | 0    | 0                     | 2 |
| 10           | 0       | 0            | 0              | 0       | 0    | 0                     | 0 |
| 11           | 0       | 0            | 0              | 0       | 0    | 0                     | 0 |
| 12           | 0       | 2            | 0              | 0       | 0    | 0                     | 3 |
| 13           | 0       | 0            | 0              | 0       | 1    | 1                     | 1 |
| 14           | 0       | 0            | 0              | 0       | 0    | 0                     | 1 |
| 15           | 0       | 0            | 0              | 0       | 1    | 1                     | 1 |
| 16           | 0       | 0            | 2              | 0       | 0    | 0                     | 4 |
| 17           | 0       | 0            | 0              | 0       | 1    | 1                     | 2 |
| 18           | 0       | 0            | 0              | 0       | 1    | 1                     | 1 |
| 19           | 0       | 0            | 0              | 0       | 1    | 1                     | 1 |
| 20           | 0       | 0            | 0              | 0       | 0    | 0                     | 0 |
| 21           | 0       | 0            | 0              | 0       | 0    | 0                     | 1 |
| 22           | 0       | 0            | 0              | 0       | 0    | 0                     | 0 |
| 23           | 0       | 0            | 0              | 0       | 0    | 0                     | 1 |
| 24           | 0       | 0            | 0              | 0       | 0    | 0                     | 0 |
| 25           | 2       | 0            | 0              | 0       | 2    | 2                     | 5 |
| 26           | 0       | 0            | 0              | 0       | 0    | 0                     | 1 |
| 27           | 0       | 2            | 0              | 0       | 0    | 0                     | 2 |
| 28           | 0       | 0            | 0              | 0       | 0    | 0                     | 0 |
| 30           | 0       | 2            | 0              | 0       | 1    | 1                     | 6 |
| 31           | 0       | 2            | 0              | 0       | 1    | 1                     | 4 |
| 32           | 0       | 0            | 0              | 0       | 0    | 0                     | 0 |
| 33           | 0       | 0            | 0              | 0       | 0    | 0                     | 0 |
| 34           | 0       | 2            | 0              | 0       | 0    | 0                     | 2 |
| 35           | 0       | 0            | 0              | 0       | 1    | 1                     | 1 |
| 36           | 0       | 2            | 0              | 0       | 0    | 0                     | 2 |
| 37           | 0       | 2            | 0              | 0       | 1    | 1                     | 4 |
| 38           | 0       | 2            | 0              | 0       | 0    | 0                     | 3 |
| 39           | 0       | 0            | 0              | 0       | 0    | 0                     | 0 |
| 40           | 0       | 2            | 0              | 0       | 0    | 0                     | 3 |
| 41           | 0       | 2            | 0              | 0       | 0    | 0                     | 2 |
| 42           | 0       | 0            | 0              | 0       | 0    | 0                     | 1 |
| 43           | 0       | 0            | 2              | 0       | 0    | 0                     | 2 |
| 44           | 0       | 0            | 0              | 0       | 0    | 0                     | 0 |
| 45           | 0       | 0            | 0              | 0       | 1    | 1                     | 2 |
| 46           | 0       | 2            | 0              | 0       | 1    | 1                     | 6 |

|    |   |   |   |   |   |   |
|----|---|---|---|---|---|---|
| 47 | 0 | 0 | 0 | 0 | 0 | 0 |
| 48 | 0 | 2 | 0 | 0 | 1 | 3 |
| 49 | 0 | 0 | 0 | 0 | 0 | 3 |
| 50 | 0 | 0 | 0 | 0 | 0 | 4 |
| 51 | 0 | 0 | 0 | 0 | 0 | 0 |
| 52 | 0 | 0 | 0 | 0 | 0 | 1 |
| 53 | 0 | 0 | 0 | 0 | 0 | 1 |
| 55 | 0 | 0 | 0 | 0 | 0 | 0 |
| 56 | 0 | 2 | 0 | 0 | 0 | 2 |
| 57 | 0 | 2 | 0 | 0 | 1 | 3 |
| 58 | 0 | 0 | 0 | 0 | 0 | 1 |
| 59 | 0 | 2 | 0 | 0 | 0 | 2 |
| 61 | 0 | 0 | 0 | 0 | 1 | 2 |
| 62 | 0 | 0 | 0 | 0 | 0 | 0 |
| 63 | 0 | 2 | 0 | 0 | 1 | 4 |
| 64 | 0 | 0 | 0 | 0 | 1 | 1 |
| 65 | 0 | 0 | 0 | 0 | 0 | 0 |
| 66 | 0 | 0 | 0 | 0 | 1 | 3 |
| 67 | 0 | 2 | 0 | 0 | 0 | 3 |
| 68 | 0 | 0 | 0 | 0 | 1 | 2 |
| 69 | 0 | 0 | 0 | 0 | 1 | 1 |
| 70 | 0 | 0 | 0 | 0 | 1 | 2 |
| 71 | 0 | 0 | 0 | 0 | 0 | 0 |
| 72 | 0 | 0 | 0 | 0 | 0 | 1 |
| 73 | 0 | 0 | 0 | 0 | 0 | 0 |
| 74 | 0 | 0 | 0 | 0 | 1 | 3 |
| 75 | 0 | 0 | 0 | 0 | 0 | 1 |
| 76 | 2 | 0 | 0 | 0 | 2 | 5 |
| 77 | 0 | 0 | 0 | 0 | 0 | 1 |
| 78 | 0 | 2 | 0 | 0 | 0 | 2 |
| 79 | 0 | 0 | 0 | 0 | 0 | 0 |
| 81 | 0 | 2 | 0 | 0 | 1 | 6 |
| 82 | 0 | 2 | 0 | 0 | 1 | 4 |
| 83 | 0 | 0 | 0 | 0 | 0 | 0 |
| 84 | 0 | 0 | 0 | 0 | 0 | 0 |
| 85 | 0 | 0 | 0 | 0 | 1 | 1 |
| 86 | 0 | 0 | 0 | 0 | 0 | 1 |
| 87 | 0 | 2 | 0 | 0 | 0 | 2 |
| 88 | 0 | 2 | 0 | 0 | 1 | 3 |
| 89 | 0 | 0 | 0 | 0 | 1 | 3 |
| 90 | 0 | 0 | 0 | 0 | 0 | 1 |
| 91 | 0 | 2 | 0 | 0 | 0 | 3 |
| 92 | 0 | 2 | 0 | 0 | 0 | 2 |
| 93 | 0 | 0 | 0 | 0 | 1 | 2 |
| 94 | 0 | 0 | 2 | 0 | 0 | 2 |
| 95 | 0 | 0 | 0 | 0 | 0 | 0 |
| 96 | 0 | 0 | 0 | 0 | 1 | 3 |
| 97 | 0 | 2 | 0 | 0 | 1 | 5 |
| 98 | 0 | 0 | 0 | 0 | 0 | 0 |
| 99 | 0 | 2 | 0 | 0 | 1 | 3 |

|     |   |   |   |   |   |   |
|-----|---|---|---|---|---|---|
| 100 | 0 | 0 | 0 | 0 | 1 | 5 |
| 101 | 0 | 0 | 0 | 0 | 0 | 4 |
| 102 | 0 | 0 | 0 | 0 | 0 | 0 |
| 3   | 0 | 2 | 0 | 0 | 2 | 5 |
| 9   | 0 | 2 | 0 | 0 | 0 | 2 |
| 29  | 0 | 2 | 0 | 0 | 2 | 4 |
| 54  | 0 | 2 | 0 | 0 | 2 | 5 |
| 60  | 0 | 2 | 0 | 0 | 1 | 3 |
| 80  | 0 | 2 | 0 | 0 | 2 | 4 |

**video number EQUUS-FAP**

- 1 control 5
- 2 patient 2 2 hours after NSAIDs Saturday
- 4 control 3
- 5 patient 4 second morning after surgery no NSAID
- 6 patient 7 day 1 after NSAIDs
- 7 control 4
- 8 control 6
- 10 control 22
- 11 patient 5 before NSAID
- 12 control 1
- 13 patient 8 before surgery
- 14 control 7
- 15 patient 2 after NSAIDs Sunday
- 16 patient 4 before surgery
- 17 control 8
- 18 patient 6 2 hours after surgery
- 19 control 2
- 20 control 9
- 21 patient 2 before NSAIDs Saturday
- 22 control 10
- 23 patient 9 after NSAIDs
- 24 control 11
- 25 patient 6 8 hours after surgery
- 26 control 19
- 27 patient 5 2 hours after NSAIDs
- 28 control 14
- 30 Patient 3
- 31 patient 7 day 2 before NSAIDs
- 32 control 15
- 33 patient 6 before surgery
- 34 control 18
- 35 patient 4 2 hours after surgery
- 36 control 21
- 37 patient 1 post NSAID
- 38 patient 9 before NSAIDs
- 39 control 12
- 40 patient 2 before NSAIDs Sunday

41 control 13  
42 patient 7 after surgery before NSAIDs  
43 patient 4 morning after surgery after NSAID  
44 control 20  
45 patient 6 morning after surgery  
46 patient 8 2 hours after surgery  
47 control 16  
48 patient 14 morning after surgery before NSAIDs  
49 patient 1 pre NSAID  
50 patient 10 pre-euthanasia  
51 controle 17

52 control 5  
53 patient 2 2 hours after NSAIDs saturday  
55 control 3  
56 patient 4 second morning after surgery no NSAID  
57 patient 7 first day after surgery before NSAIDs  
58 control 4  
59 control 6  
61 control 22  
62 patient 5 before NSAIDs  
63 control 1  
64 patient 8 before surgery  
65 control 7  
66 patient 2 after NSAIDs sunday  
67 patient 4 before surgery  
68 control 8  
69 patient 6 2 hours after surgery  
70 control 2  
71 control 9  
72 patient 2 before NSAID Saturday  
73 control 10  
74 patient 9 after NSAIDs  
75 control 11  
76 patient 6 8 hours after surgery  
77 control 19  
78 patient 5 2 hours after NSAIDs  
79 control 14  
81 Patient 3  
82 patient 7 day 2 before NSAIDs  
83 control 15  
84 patient 6 before surgery  
85 control 18  
86 patient 4 2 hours after surgery  
87 control21  
88 patient 1 after NSAID  
89 patient 9 before NSAIDs  
90 control 12  
91 patient 2 before NSAIDs sunday  
92 control 13

93 patient 7 2 hours after surgery before NSAIDs  
94 patient 4 morning after surgery after NSAIDs  
95 control 20  
96 patient 6 first morning after surgery  
97 patient 8 2 hours after surgery  
98 control 16  
99 patient 14 morning after surgery before NSAIDs  
100 patient 1 before NSAID  
101 patient 10 pre-euthanasia  
102 control 17

3 neonatal after surgery before NSAID  
9 neonatal 24 hours after surgery before NSAIDs  
29 neonatal 24 hours after surgery after NSAIDs

54 neonatal after surgery before NSAID  
60 neonatal 24 hours after surgery before NSAIDs  
80 neonatal 24 hours after surgery after NSAIDs
